# Supplementary material for: Impact of Imaging-Guided Localization on Performance of Tailored Axillary Surgery in Patients with Clinically Node-Positive Breast Cancer: Prospective Cohort Study Within TAXIS (OPBC-03, SAKK 23/16, IBCSG 57-18, ABCSG-53, GBG 101)
Source: Ann Surg Oncol. 2023 Oct 30;31(1):344–55. doi: 10.1245/s10434-023-14404-4 (PMC10695869; doi:10.1245/s10434-023-14404-4)
Supplement: Supplementary file 1 — Supplementary file1 (DOCX 39 kb) [file 10434_2023_14404_MOESM1_ESM.docx]

**Supplementary Material**

**Impact of imaging-guided localization on performance of tailored axillary surgery in patients with clinically node-positive breast cancer: Prospective cohort study within TAXIS (OPBC-03, SAKK 23/16, IBCSG 57-18, ABCSG-53, GBG 101)**

Walter P. Weber, MD1,2,*,†; Martin Heidinger, MD1,2,†; Stefanie Hayoz, PhD3; Zoltan Matrai, MD, PhD4; Christoph Tausch, MD2,5; Guido Henke, MD6,7; Daniel R. Zwahlen, MD8; Günther Gruber, MD9; Frank Zimmermann, MD2,10; Giacomo Montagna, MD, MPH11; Mariacarla Andreozzi, PhD1,2; Maite Goldschmidt1,2; Alexandra Schulz2,12; Andreas Mueller, MD3,13; Markus Ackerknecht, PhD2,14; Ekaterini Christina Tampaki, MD, PhD15; Vesna Bjelic-Radisic, MD16; Christian Kurzeder, MD1,2; Ákos Sávolt MD, PhD17; Viktor Smanykó, MD18; Daniela Hagen, MD13; Dieter J. Müller, MD19;Michael Gnant, MD20,21, Sibylle Loibl, MD22; Florian Fitzal, MD21,23; Pagona Markellou, MD7; Inga Bekes, MD7; Daniel Egle, MD21,24;Jörg Heil, MD25 and Michael Knauer, MD, PhD26

† Contributed equally

1 Breast Center, University Hospital Basel, Basel, Switzerland

2 University of Basel, Basel, Switzerland

3 SAKK Competence Center, Bern, Switzerland

4 Hamad Medical Corporation, Dept of Oncoplastic Breast Surgery, Doha, Qatar

5 Breast Center Zurich, Zurich, Switzerland

6 Department of Radiation Oncology, St. Gallen Cantonal Hospital, St. Gallen, Switzerland

7 Breast Center, St. Gallen Cantonal Hospital, St. Gallen, Switzerland

8 Department of Radiation Oncology, Cantonal Hospital Winterthur, Winterthur, Switzerland

9 Institute of Radiotherapy, Klinik Hirslanden, Zurich, Switzerland

10 Clinic of Radiation Oncology, University Hospital Basel, Basel, Switzerland

11Breast Service, Department of Surgery, Memorial Sloan Kettering Cancer Center, New York, NY, USA

12Department of Clinical Research, University Hospital Basel, Basel, Switzerland

13 Breast Center, Cantonal Hospital Winterthur, Winterthur, Switzerland

14 Department of Biomedicine, University Hospital Basel, Basel, Switzerland

15 Department of Plastic, Reconstructive Surgery and Burn Unit, KAT Athens Hospital and Trauma Center, Athens, Greece

16 Breast Unit, Helios University Clinic, University Witten/Herdecke, Germany

17 National Institute of Oncology, Budapest, Hungary

18 National Tumor Biology Laboratory, National Institute of Oncology, Budapest, Hungary

19 Bethesda Spital AG, Basel, Switzerland

20 Comprehensive Cancer Center, Medical University of Vienna, Vienna, Austria

21 ABCSG, Austrian Breast and Colorectal Cancer Study Group, Vienna, Austria

22 German Breast Group, GBG Forschungs GmbH, Neu-Isenburg, Germany

23 Atomos Klinik Waehring, Vienna, Austria

24 Breast Cancer Center Tirol, Department of Gynecology, Medical University Innsbruck, Innsbruck, Austria

25 Breast Center Heidelberg, Heidelberg, Germany

26 Tumor and Breast Center Eastern Switzerland, St. Gallen, Switzerland

*** Corresponding Author:** Prof. Walter P. Weber, Breast Center, University Hospital Basel, Spitalstrasse 21, 4031 Basel, Switzerland; e-mail: walter.weber@usb.ch; phone: +41 61 328 61 49.

**Table S1. STROBE Statement**

|  | | Item No | Recommendation | Page No |
| --- | --- | --- | --- | --- |
| **Title and abstract** | | 1 | (*a*) Indicate the study’s design with a commonly used term in the title or the abstract | 1 |
| (*b*) Provide in the abstract an informative and balanced summary of what was done and what was found | 7-8 |
| Introduction | | | | |
| Background/rationale | | 2 | Explain the scientific background and rationale for the investigation being reported | 9 |
| Objectives | | 3 | State specific objectives, including any prespecified hypotheses | 10 |
| Methods | | | | |
| Study design | | 4 | Present key elements of study design early in the paper | 10 |
| Setting | | 5 | Describe the setting, locations, and relevant dates, including periods of recruitment, exposure, follow-up, and data collection | 10 |
| Participants | | 6 | (*a*) Give the eligibility criteria, and the sources and methods of selection of participants. Describe methods of follow-up | 10 |
| (*b*)For matched studies, give matching criteria and number of exposed and unexposed |  |
| Variables | | 7 | Clearly define all outcomes, exposures, predictors, potential confounders, and effect modifiers. Give diagnostic criteria, if applicable | 11-13 |
| Data sources/ measurement | | 8* | For each variable of interest, give sources of data and details of methods of assessment (measurement). Describe comparability of assessment methods if there is more than one group | 10-13 |
| Bias | | 9 | Describe any efforts to address potential sources of bias | 10-13 |
| Study size | | 10 | Explain how the study size was arrived at | 10 |
| Quantitative variables | | 11 | Explain how quantitative variables were handled in the analyses. If applicable, describe which groupings were chosen and why | 10-13 |
| Statistical methods | | 12 | (*a*) Describe all statistical methods, including those used to control for confounding | 13 |
| (*b*) Describe any methods used to examine subgroups and interactions |  |
| (*c*) Explain how missing data were addressed |  |
| (*d*) If applicable, explain how loss to follow-up was addressed |  |
| (*e*) Describe any sensitivity analyses |  |
| Results | | | |  |
| Participants | | 13* | (a) Report numbers of individuals at each stage of study—eg numbers potentially eligible, examined for eligibility, confirmed eligible, included in the study, completing follow-up, and analysed |  |
| (b) Give reasons for non-participation at each stage | 14-15; Figure 1 |
| (c) Consider use of a flow diagram |  |
| Descriptive data | | 14* | (a) Give characteristics of study participants (eg demographic, clinical, social) and information on exposures and potential confounders | 14-15; Tables 1, 2, 3, 5 |
| (b) Indicate number of participants with missing data for each variable of interest |  |
| (c) Summarise follow-up time (eg, average and total amount) |  |
| Outcome data | | 15* | Report numbers of outcome events or summary measures over time | 14-16 |
| Main results | 16 | (*a*) Give unadjusted estimates and, if applicable, confounder-adjusted estimates and their precision (eg, 95% confidence interval). Make clear which confounders were adjusted for and why they were included | | 14-16 |
| (*b*) Report category boundaries when continuous variables were categorized | |  |
| (*c*) If relevant, consider translating estimates of relative risk into absolute risk for a meaningful time period | |  |
| Other analyses | 17 | Report other analyses done—eg analyses of subgroups and interactions, and sensitivity analyses | | 14-16 |
| Discussion | | | | |
| Key results | 18 | Summarise key results with reference to study objectives | | 16-19 |
| Limitations | 19 | Discuss limitations of the study, taking into account sources of potential bias or imprecision. Discuss both direction and magnitude of any potential bias | | 19-20 |
| Interpretation | 20 | Give a cautious overall interpretation of results considering objectives, limitations, multiplicity of analyses, results from similar studies, and other relevant evidence | | 20 |
| Generalisability | 21 | Discuss the generalisability (external validity) of the study results | | 16-20 |
| Other information | | | | |
| Funding | 22 | Give the source of funding and the role of the funders for the present study and, if applicable, for the original study on which the present article is based | | 3 |

**Table S2. Characteristics of IGL in excluded patients**

|  | **Total excluded patients (N=2271)** | **Excluded patients with nodal pCR (N=1681)** | **Excluded patients other than nodal pCR (N=591)** | **p-value2** |
| --- | --- | --- | --- | --- |
| IGL attempted | 210 (92.5%) | 155 (92.3%) | 55 (93.2%) | 0.8 |
| IGL successful | 177 (84.3%) | 144 (92.9%) | 33 (60.0%) | <0.001 |
| Type of clip used | N= 227 | N=168 | N=59 | 0.2 |
| Direct Magseed | 8 (3.5%) | 7 (4.2%) | 1 (1.7%) |
| Nitinol ring marker (nickel titanium alloy) | 65 (28.6%) | 49 (29.2%) | 16 (27.1%) |
| Titanium or stainless steel marker with gel | 63 (27.8%) | 41 (24.4%) | 22 (37.3%) |
| Titanium or stainless steel marker without gel | 80 (35.2%) | 62 (36.9%) | 18 (30.5%) |
| Other | 11 (4.8%) | 9 (5.4%) | 2 (3.4%) |
| Reasons for failed IGL | N=273 | N=6 | N=21 | 0.10 |
| Clip not visible | 21 (77.8%) | 3 (50.0%) | 18 (85.7%) |
| Close to vessel | 1 (3.7%) | 1 (16.7%) | 0 (0.0%) |
| Other | 5 (18.5%) | 2 (33.3%) | 3 (14.3%) |

1 Patients with unknown IGL status (n=23) were excluded

2 Fisher's exact test

3 In 6 patients IGL success was unsure

**Table S3. Linear regression model for the effect of imaging-guided localization on the number of total and positive nodes removed and logistic regression model for the effect on residual nodal disease in the axilla after TAS.**

|  | Unadjusted | | | Adjusted | | |
| --- | --- | --- | --- | --- | --- | --- |
|  | Coefficient | 95% CI | p-value | Coefficient | 95% CI | p-value |
| Total number of lymph nodes removed by TAS | 0.55 | -0.61 - 1.71 | 0.349 | 0.69 | -0.53 - 1.90 | 0.267 |
| Number of positive lymph nodes removed by TAS | 0.30 | -0.51 - 1.11 | 0.468 | 0.44 | -0.40 - 1.28 | 0.306 |
|  | Odds ratio | 95% CI | p-value | Odds ratio | 95% CI | p-value |
| Residual nodal disease after TAS | 0.61 | 0.31 - 1.19 | 0.146 | 0.73 | 0.34 - 1.57 | 0.414 |

Multivariable analyses adjusted for upfront surgery vs neoadjuvant chemotherapy, palpable vs non-palpable disease, tumor receptor subtype, grade, age, year and country. The group without use of imaging-guided localization was defined as the reference group.
